# Supplementary material
Source: publisher site journal article supplement (https://www.dovepress.com/article/96589)
Supplement: Supplementary file 1 [file get_supplementary_file.php]

## Supplementary material

### References

1. Burgess JA, van der Ven PF, Martin M, Sherman J, Haley J. Review of over-the-counter treatments for aphthous ulceration and results from use of a dissolving oral patch containing glycyrrhiza complex herbal extract. *J Contemp Dent Pract.* 2008;9(3):88–98.
2. Chang YH. Traditional Chinese medicine care of patients with stomatitis. *Zhonghua Hu Li Za Zhi.* 1986;21(4):161–162. Chinese.
3. Hun JL, Hu Y, Fan YF. Relapsing aphthous ulcer treated with traditional Chinese medicine and Western medicine therapy and the determination of urinary 17-ketosteroid and serum cholinesterase. *Zhong Xi Yi Jie He Za Zhi.* 1987;7(9):535–536, 516–537. Chinese.
4. Jafari S, Amanlou M, Borhan-Mojabi K, Farsam H. Comparative study of Zataria multiflora and Anthemis nobelis extracts with Myrthus communis preparation in the treatment of recurrent aphthous stomatitis. *Daru.* 2003;11(1):23–27.
5. Liu ZX, Zhou ZG. Clinical study on the treatment of recurrent aphthous ulcer with zhong tong'an combined with dexamethasone. *Shanghai Kou Qiang Yi Xue.* 2006;15(5):555–556. Chinese.
6. Mekseepralard C, Kamkaen N, Wilkinson JM. Antimicrobial and antioxidant activities of traditional Thai herbal remedies for aphthous ulcers. *Phytother Res.* 2010;24(10):1514–1519. doi:10.1002/ptr.3158.
7. Messier C, Epifano F, Genovese S, Grenier D. Licorice and its potential beneficial effects in common oro-dental diseases. *Oral Dis.* 2012;18(1):32–39.
8. Pan JH, Huang SJ, Zheng J, Wu W, Xue LH. [Establish proposal of diagnosis and treatment of traditional Chinese medicine in AIDS patients with recurrent oral ulcerations]. *Zhongguo Zhong Yao Za Zhi.* 2013;38(15): 2484–2488. Chinese.
9. Pan XH, Sun H, Chen Q, Ding JY, Gu WL. Clinical research for alimentary control of certain foods to remission of recurrent oral ulcer. *Hua Xi Kou Qiang Yi Xue Za Zhi.* 2010;28(1):68–70. Chinese.
10. Ruan SB, Wu FH, Wu SS. Clinical observation on treatment of 320 patients with relapsed aphthous ulcer by pearl aphthous granule. *Zhongguo Zhong Xi Yi Jie He Za Zhi.* 2004;24(3):254–255. Chinese.
11. Shen MH, Ruan SM, Bao MH. Effect of shuizhongcao granule on cellular immune function of experimental animal with recurrent aphthous stomatitis. *Zhongguo Zhong Xi Yi Jie He Za Zhi.* 2009;29(10): 901–904. Chinese.
12. Sun A, Chia JS, Chang YF, Chiang CP. Levamisole and Chinese medicinal herbs can modulate the serum interleukin-6 level in patients with recurrent aphthous ulcerations. *J Oral Pathol Med.* 2003;32(4): 206–214.
13. Weng HN. Treatment of 88 cases of recurrent aphthae by nourishing yin and supplementing blood. *Zhong Xi Yi Jie He Za Zhi.* 1984;4(6): 345–346. Chinese.
14. Xie XL, Liu BJ, Yuan SH. Clinical effect of garlic plaster on recurrent oral ulcer. *Zhong Nan Da Xue Xue Bao Yi Xue Ban.* 2004;29(3): 330–331. Chinese.
15. Zeng G, Li B, Zhang W. A study of therapeutic efficacy of Koukangning gargle in the treatment of oral mucositis. *Hua Xi Kou Qiang Yi Xue Za Zhi.* 1997;15(1):28–30, 54. Chinese.
16. Zheng LW, Hua H, Cheung LK. Traditional Chinese medicine and oral diseases: today and tomorrow. *Oral Dis.* 2011;17(1):7–12.
17. Zhongqiu J, Guofeng C. The treatment of recurrent aphthae with Chinese medicine. *Chinesische Medizin.* 2007;22(1):9–19.
